# Supplementary material for: Starvation in Mice Induces Liver Damage Associated with Autophagy
Source: MDPI journal article supplement (doi:10.3390/nu16081191), 2024-04-17
Supplement: s1 [file s1]

| Reference                  | Year | Number of patients | Sex           | Body Mass Index (BMI) (kg/m <sup>2</sup> ) ± SD | Age ± SD   | Findings                                                                                                                                                                                                               |
|----------------------------|------|--------------------|---------------|-------------------------------------------------|------------|------------------------------------------------------------------------------------------------------------------------------------------------------------------------------------------------------------------------|
| Mickley et al. [1]         | 1996 | 879                | F and M (13)  | 20 ± 2.9                                        | 22.51 ± 7  | Elevation of transaminases in 4% of anorectic (as well as anorectic and bulimic) patients.                                                                                                                             |
| Miller et al. [2]          | 2005 | 214                | F             | 16.8 ± 1.4                                      | 25 ± 6.4   | Elevation of ALT in 12% of patients.                                                                                                                                                                                   |
| Montagnese et al. [3]      | 2007 | 97                 | F             | 15.6 ± 1.4                                      | 23.3 ± 5.5 | Elevation of transaminases in 20% of patients with BMI ≤ 16 kg/m <sup>2</sup> .                                                                                                                                        |
| Fong et al. [4]            | 2008 | 53                 | F             | 18 ± 1.6                                        | 18.5 ± 2.9 | Elevation of ALT in 26% and AST in 19% of patients.                                                                                                                                                                    |
| Rautou et al. [5]          | 2008 | 12                 | F and M (2)   | 11.3 ± 1.1                                      | 25.7 ± 7.7 | Examination of liver biopsies from patients. The study neither found signs of hepatocyte necrosis nor apoptosis, instead autophagosomes and glycogen depletion were observed. Transaminases elevation in all patients. |
| Tsukamoto et al. [6]       | 2008 | 25                 | F             | 15.2 ± NR                                       | 27 ± 9     | Elevation of transaminases in 52% of patients.                                                                                                                                                                         |
| Gaudiani et al. [7]        | 2012 | 25                 | F and M (3)   | 13.1 ± 2.1                                      | 26 ± 7     | Mild elevation of transaminases (up to three times of the normal values) in 32% of patients, severe elevation (values greater than three times of the normal) in 44% of patients.                                      |
| Hanachi et al. [8]         | 2013 | 126                | F and M ( )   | 12 ± 1.8                                        | 30 ± 10.8  | Elevation of transaminases in 43% of patients.                                                                                                                                                                         |
| Nagata et al. [9]          | 2015 | 356                | F and M (39)  | 15.9 ± 1.9                                      | 16.1 ± 2.4 | Elevation of ALT was observed in 41.1% of patients. Male sex and low BMI led to increased odds of ALT elevations, while age and duration of illness did not affect odds.                                               |
| Rosen et al. [10]          | 2016 | 181                | F and M (19)  | 12.8 ± 1.8                                      | 27 ± 5     | Mild elevation of transaminases (up to three times of the normal values) in 27% of patients, severe elevation (values greater than three times than normal) in 35% of patients.                                        |
| Fanin et al. [11]          | 2020 | 34                 | F             | 15.6 ± 2.1                                      | 25 ± 6.3   | Elevation of ALT in 29% of patients. Ultrasonography indicated mild steatosis in 47% of patients.                                                                                                                      |
| Cuntz et Vorderholzer [12] | 2022 | 3755               | F and M (157) | 11.5 ± NR                                       | 31.5 ± NR  | Elevation of transaminases in >50% of patients.                                                                                                                                                                        |

| Case studies reporting starvation-induced liver damage in AN |      |                    |     |                                            |     |                                                                                                                                                                                                                                                                                                                                   |
|--------------------------------------------------------------|------|--------------------|-----|--------------------------------------------|-----|-----------------------------------------------------------------------------------------------------------------------------------------------------------------------------------------------------------------------------------------------------------------------------------------------------------------------------------|
| Reference                                                    | Year | Number of patients | Sex | Body Mass Index (BMI) (kg/m <sup>2</sup> ) | Age | Findings                                                                                                                                                                                                                                                                                                                          |
| Yaryura-Tobias et al. [13]                                   | 2000 | 1                  | F   | 14.2                                       | 23  | Patient with diabetic ketoacidosis. Signs of hepatic steatosis could be observed in computed tomography scans.                                                                                                                                                                                                                    |
| De Caprio et al. [14]                                        | 2006 | 2                  | F   | 14.1                                       | 18  | Patient with acute liver failure and signs of moderate steatosis in sonography.                                                                                                                                                                                                                                                   |
|                                                              |      |                    |     | 13.2                                       | 30  | Patient with signs of acute liver failure, normalizing after weight gain.                                                                                                                                                                                                                                                         |
| Sakada et al. [15]                                           | 2006 | 1                  | F   | 7.6                                        | 20  | Patient presenting with signs of mild hepatic steatosis and liver atrophy in CT scans. Transaminase elevations were observed. While the patient's nutritional condition improved, the patient developed a fatal hepatic failure. Autopsy findings confirmed the presence of hepatic steatosis and reported pericellular fibrosis. |
| Harris et al. [16]                                           | 2012 | 1                  | F   | 10.7                                       | 34  | Patient with severe transaminase elevation. A liver biopsy showed mild cell swelling, mild fibrosis and mild macro-vesicular steatosis.                                                                                                                                                                                           |
| Restellini et al. [17]                                       | 2013 | 1                  | F   | 14                                         | 24  | Patient with elevated transaminases, liver biopsy with signs of autophagy.                                                                                                                                                                                                                                                        |
| Ramsoekh et al. [18]                                         | 2014 | 1                  | F   | 12.4                                       | 43  | Patient with elevated transaminases. Liver biopsy with several apoptotic hepatocytes and iron deposition.                                                                                                                                                                                                                         |
| Takata et al. [19]                                           | 2021 | 1                  | F   | 14                                         | 36  | Patient with ascites, gastroesophageal varices and elevation of transaminase values. Liver biopsy with mild steatosis, mild chronic inflammation, fibrosis and benign nodular lesions.                                                                                                                                            |
| Su et al. [20]                                               | 2021 | 1                  | F   | 14.2                                       | 45  | Patient with elevated transaminases. Liver biopsy showed mild depletion of glycogen and scattered atrophy of hepatocytes.                                                                                                                                                                                                         |
| Faragalla et al. [21]                                        | 2022 | 1                  | F   | 12.7                                       | 19  | Patient with elevation of transaminase values. Liver biopsy with glycogen depletion, iron deposition and hyperplastic Kupffer cells.                                                                                                                                                                                              |
| Sakata et al. [22]                                           | 2022 | 1                  | F   | 11.2                                       | 34  | Patient with hypoglycemic coma and elevated transaminase values.                                                                                                                                                                                                                                                                  |
| Wallace et al. [23]                                          | 2023 | 1                  | F   | 10.3                                       | 30  | Patient with hypoglycemia, elevation of transaminases, which decreased when enteral feeding was initiated.                                                                                                                                                                                                                        |

## References

1. Mickley, D., et al., *Abnormal liver enzymes in outpatients with eating disorders*. Int J Eat Disord, 1996. 20(3): p. 325-9.
2. Miller, K.K., et al., *Medical findings in outpatients with anorexia nervosa*. Arch Intern Med, 2005. 165(5): p. 561-6.
3. Montagnese, C., et al., *Cholinesterase and other serum liver enzymes in underweight outpatients with eating disorders*. Int J Eat Disord, 2007. 40(8): p. 746-50.
4. Fong, H.F., et al., *Prevalence and predictors of abnormal liver enzymes in young women with anorexia nervosa*. J Pediatr, 2008. 153(2): p. 247-53.
5. Rautou, P.E., et al., *Acute liver cell damage in patients with anorexia nervosa: a possible role of starvation-induced hepatocyte autophagy*. Gastroenterology, 2008. 135(3): p. 840-8, 848 e1-3.
6. Tsukamoto, M., et al., *Hepatocellular injuries observed in patients with an eating disorder prior to nutritional treatment*. Intern Med, 2008. 47(16): p. 1447-50.
7. Gaudiani, J.L., et al., *Severe anorexia nervosa: outcomes from a medical stabilization unit*. Int J Eat Disord, 2012. 45(1): p. 85-92.
8. Hanachi, M., J.C. Melchior, and P. Crenn, *Hypertransaminasemia in severely malnourished adult anorexia nervosa patients: risk factors and evolution under enteral nutrition*. Clin Nutr, 2013. 32(3): p. 391-5.
9. Nagata, J.M., et al., *Associations of elevated liver enzymes among hospitalized adolescents with anorexia nervosa*. J Pediatr, 2015. 166(2): p. 439-43 e1.
10. Rosen, E., et al., *Liver dysfunction in patients with severe anorexia nervosa*. Int J Eat Disord, 2016. 49(2): p. 151-8.
11. Fanin, A., et al., *Liver alterations in anorexia nervosa are not caused by insulin resistance*. Intern Emerg Med, 2020. 15(2): p. 337-339.
12. Cuntz, U. and U. Voderholzer, *Liver Damage Is Related to the Degree of Being Underweight in Anorexia Nervosa and Improves Rapidly with Weight Gain*. Nutrients, 2022. 14(12).
13. Yaryura-Tobias, J.A., A. Pinto, and F. Neziroglu, *Anorexia nervosa, diabetes mellitus, brain atrophy, and fatty liver*. Int J Eat Disord, 2001. 30(3): p. 350-3.
14. De Caprio, C., et al., *Severe acute liver damage in anorexia nervosa: two case reports*. Nutrition, 2006. 22(5): p. 572-5.
15. Sakada, M., et al., *Severe steatosis resulted from anorexia nervosa leading to fatal hepatic failure*. J Gastroenterol, 2006. 41(7): p. 714-5.
16. Harris, R.H., G. Sasson, and P.S. Mehler, *Elevation of liver function tests in severe anorexia nervosa*. Int J Eat Disord, 2013. 46(4): p. 369-74.
17. Restellini, S., L. Spahr, and L. Rubbia Brandt, *Severe starvation-induced hepatocyte autophagy as a cause of acute liver injury in anorexia nervosa: a case report*. Case Reports Hepatol, 2013. 2013: p. 749169.
18. Ramsoekh, D., P. Taimr, and T. Vanwolleghem, *Reversible severe hepatitis in anorexia nervosa: a case report and overview*. Eur J Gastroenterol Hepatol, 2014. 26(4): p. 473-7.
19. Takata, K., et al., *Gastroesophageal Varices and Hyperplastic Nodules of the Liver in a Patient with Anorexia Nervosa*. Intern Med, 2021. 60(19): p. 3107-3112.
20. Su, A., et al., *Two Acute Liver Injuries in a Patient With Malnutrition*. J Med Cases, 2021. 12(8): p. 315-318.
21. Faragalla, K., et al., *Value of liver biopsy in anorexia nervosa-related transaminitis: A case study and literature review*. Hepatol Res, 2022. 52(7): p. 652-658.
22. Sakata, M., et al., *Pathogenesis of Severe Liver Injury in Patients with Anorexia Nervosa: A Report of Two Cases and a Literature Review*. Kurume Med J, 2022. 67(2.3): p. 121-129.
23. Wallace, J.M., et al., *A Hepatic Manifestation of Anorexia Nervosa*. Eur J Case Rep Intern Med, 2023. 10(5): p. 003675.
